# Supplementary material for: Endoscopic full-thickness plication for the treatment of gastroesophageal reflux disease: A systematic review and meta-analysis
Source: PubMed Central journal article supplement — Endosc Int Open. 2024 Feb 12;12(2):E199–210. doi: 10.1055/a-2231-7136 (PMC10883465; doi:10.1055/a-2231-7136), 2024-02-12
Supplement: 10-1055-a-2231-7136_22490519.pdf [file 10-1055-a-2231-7136_22490519.pdf]

## Supplementary material

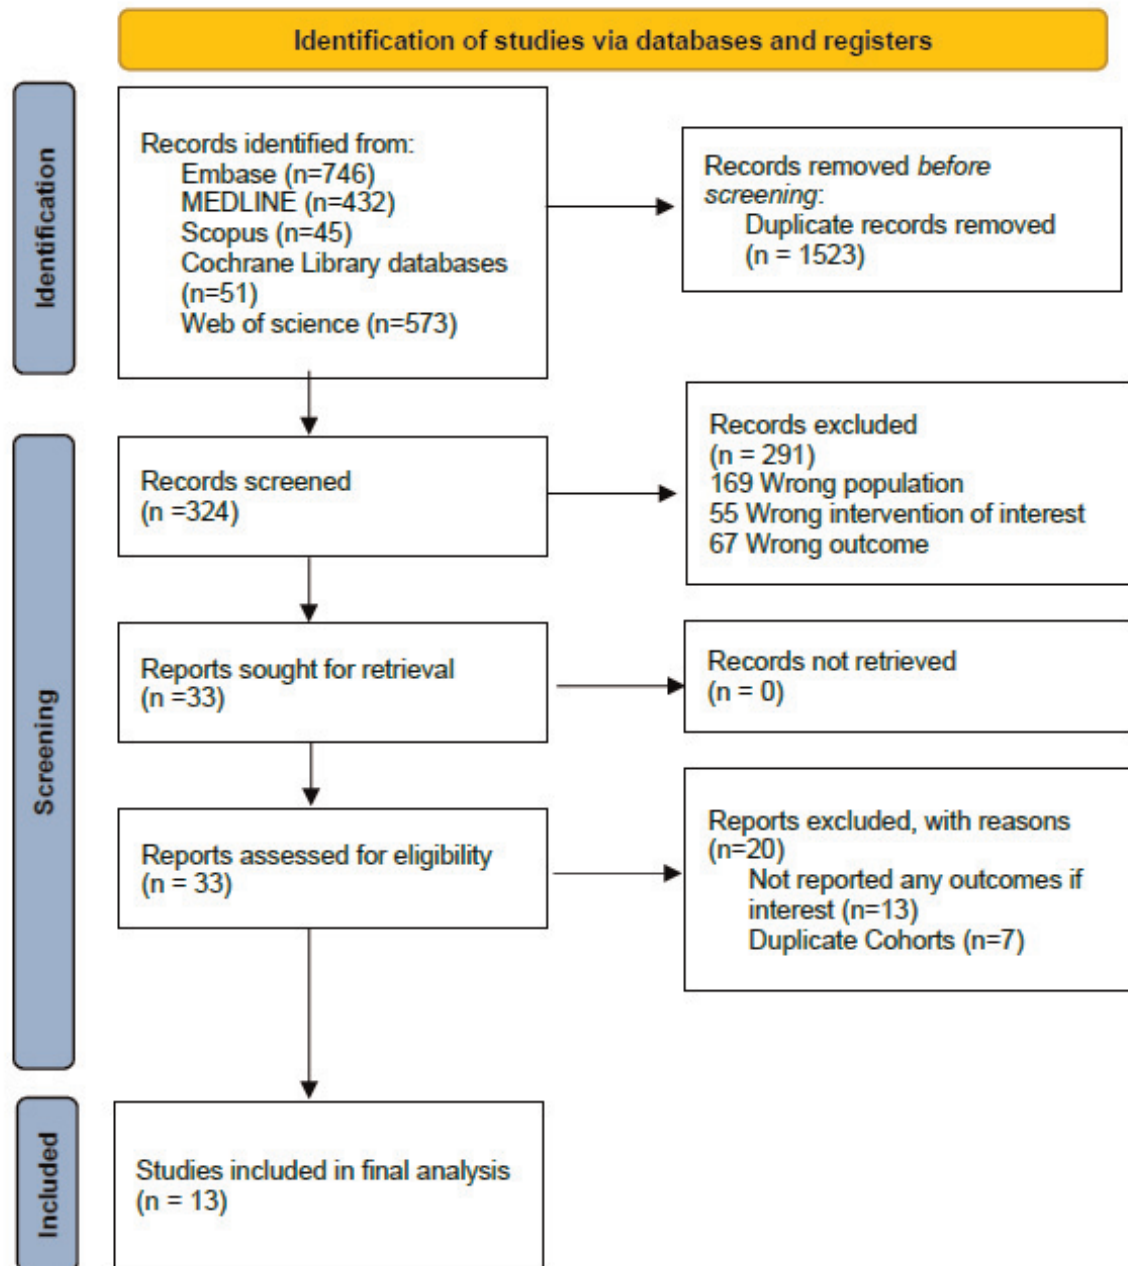

► **Supplemental Fig. 1** Flowchart of study selection process.

## Supplementary material

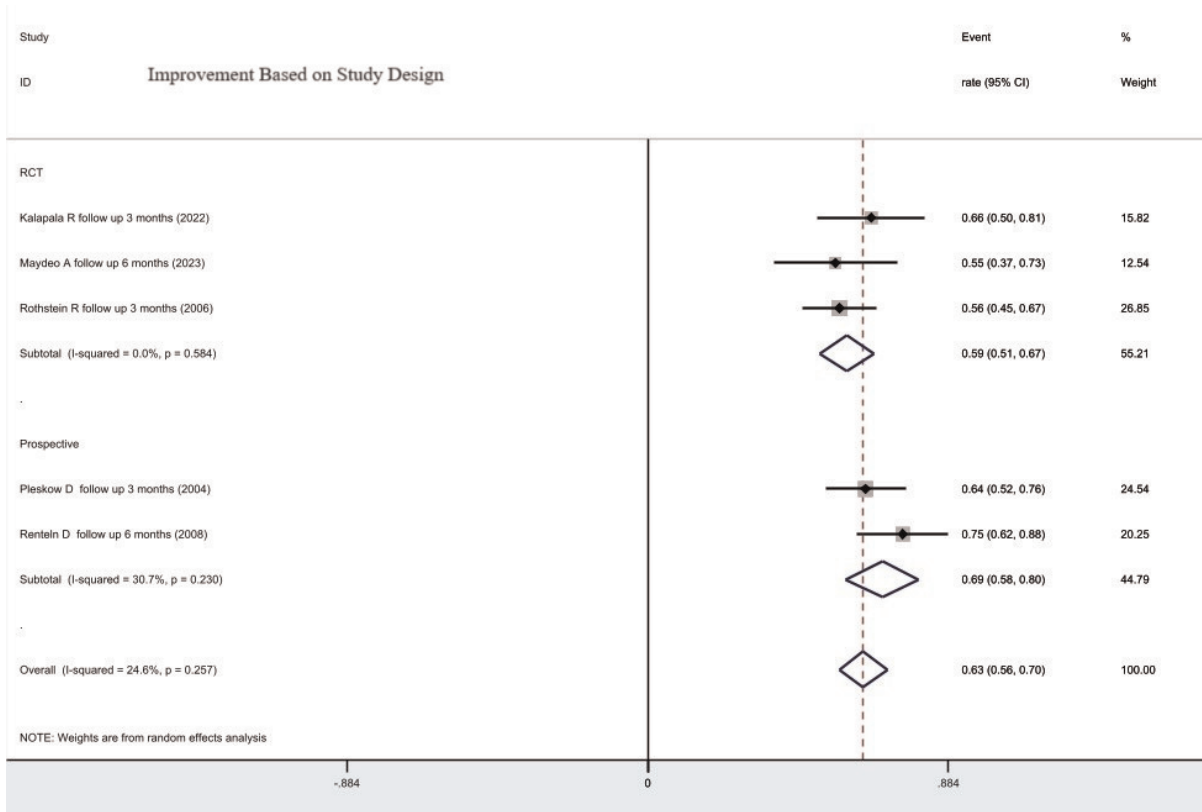

► **Supplemental Fig. 2** Forest Plot of Subgroup Analysis: Comparing GERD-HRQL Score Improvement Based on Study Design.

## Supplementary material

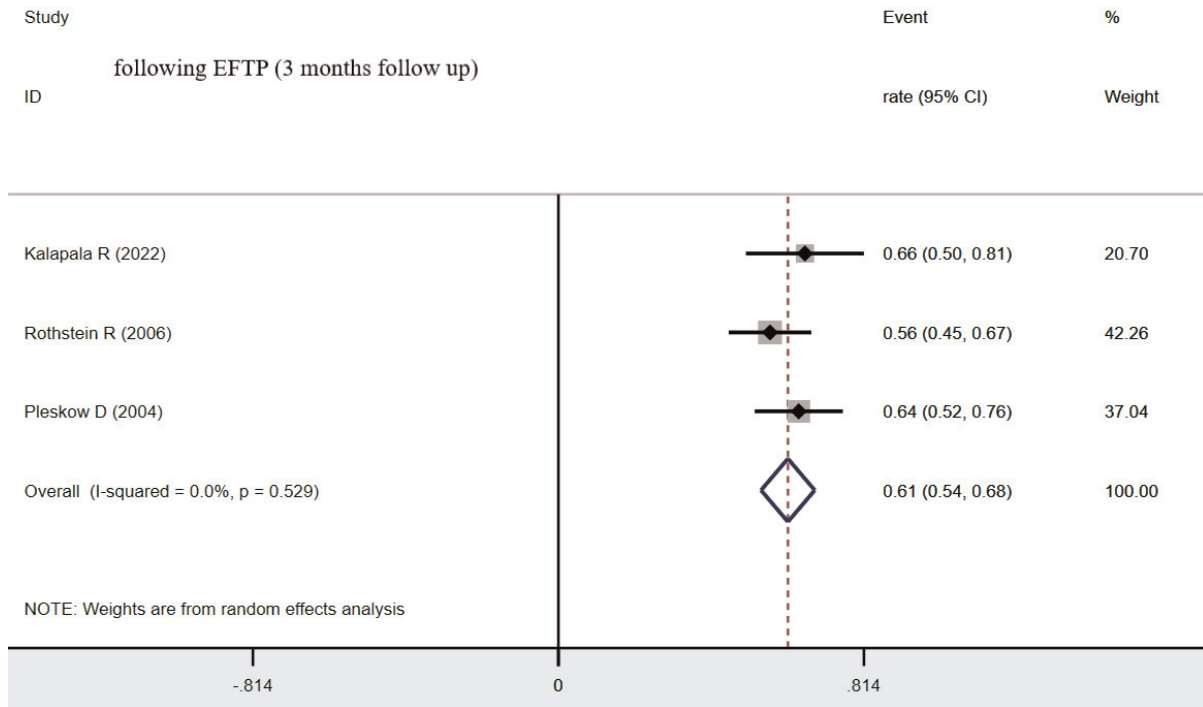

► **Supplemental Fig. 3** Forest plot of the change in GERD-HRQL scores following EFTP (3 months follow up).

## Supplementary material

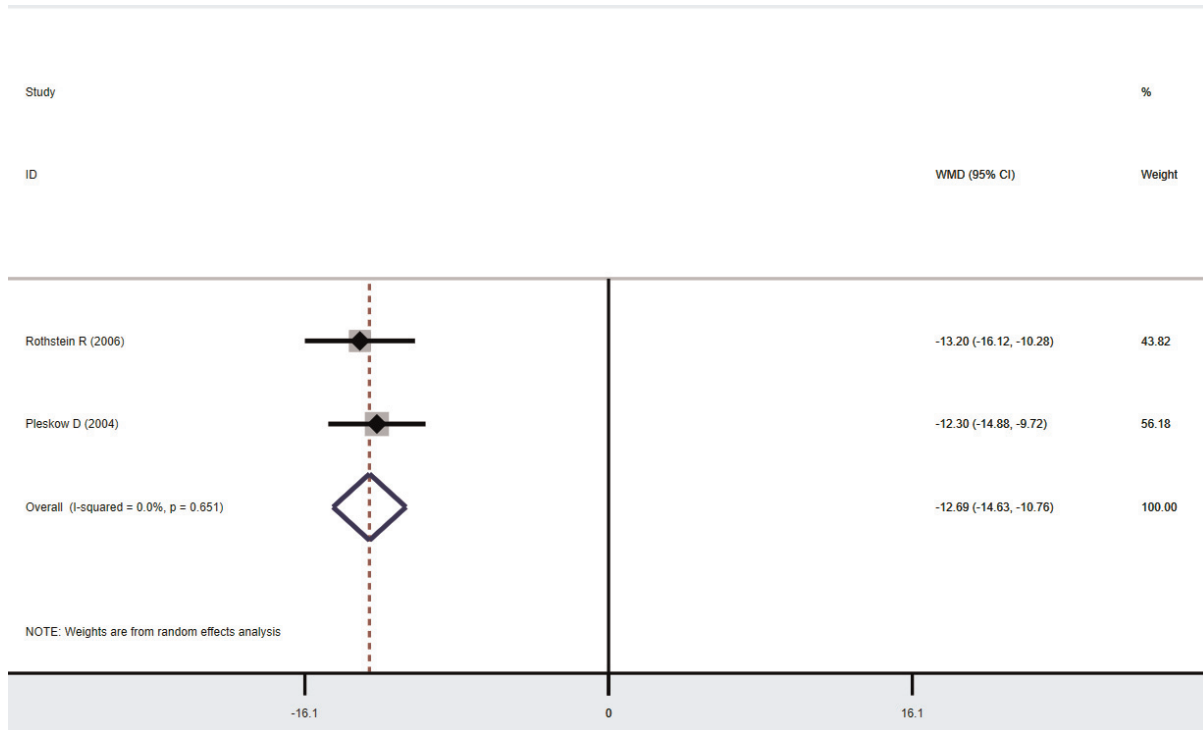

► **Supplemental Fig. 4** Forest plot of the change in GERD-HRQL scores following EFTP (3 months follow up).

## Supplementary material

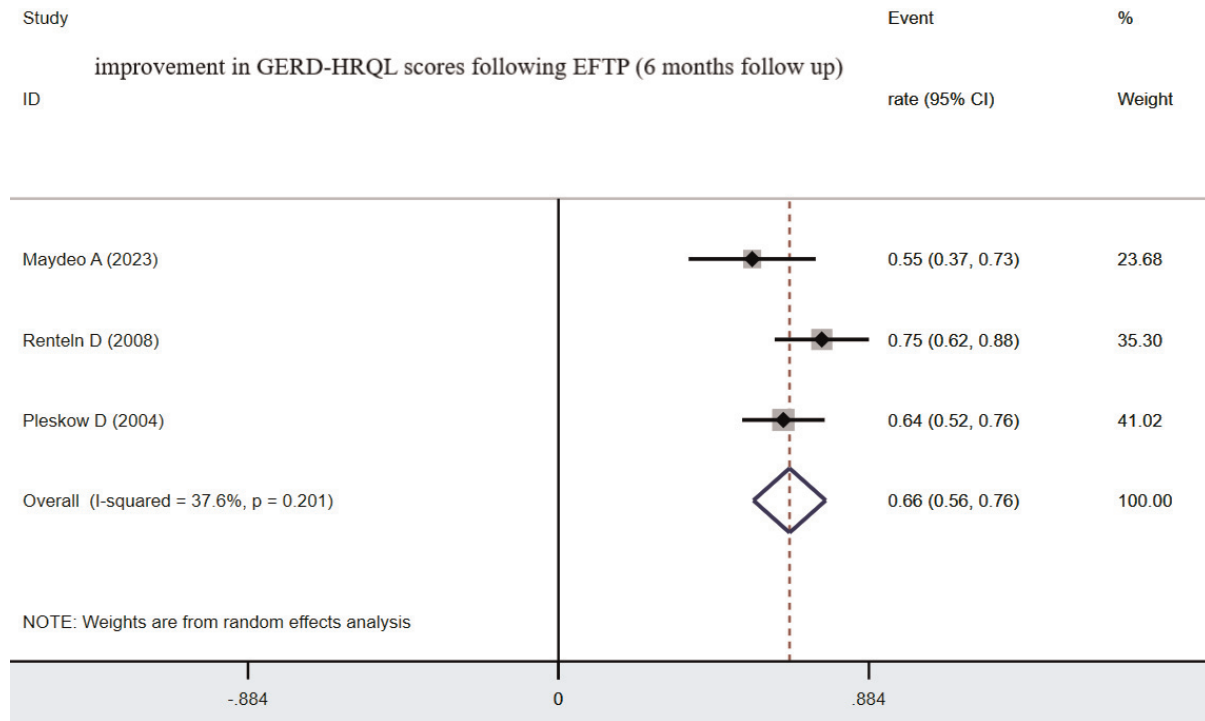

► **Supplemental Fig. 5** Forest plot of the proportion of patients with a  $\geq 50\%$  improvement in GERD-HRQL scores following EFTP (6 months follow up).

## Supplementary material

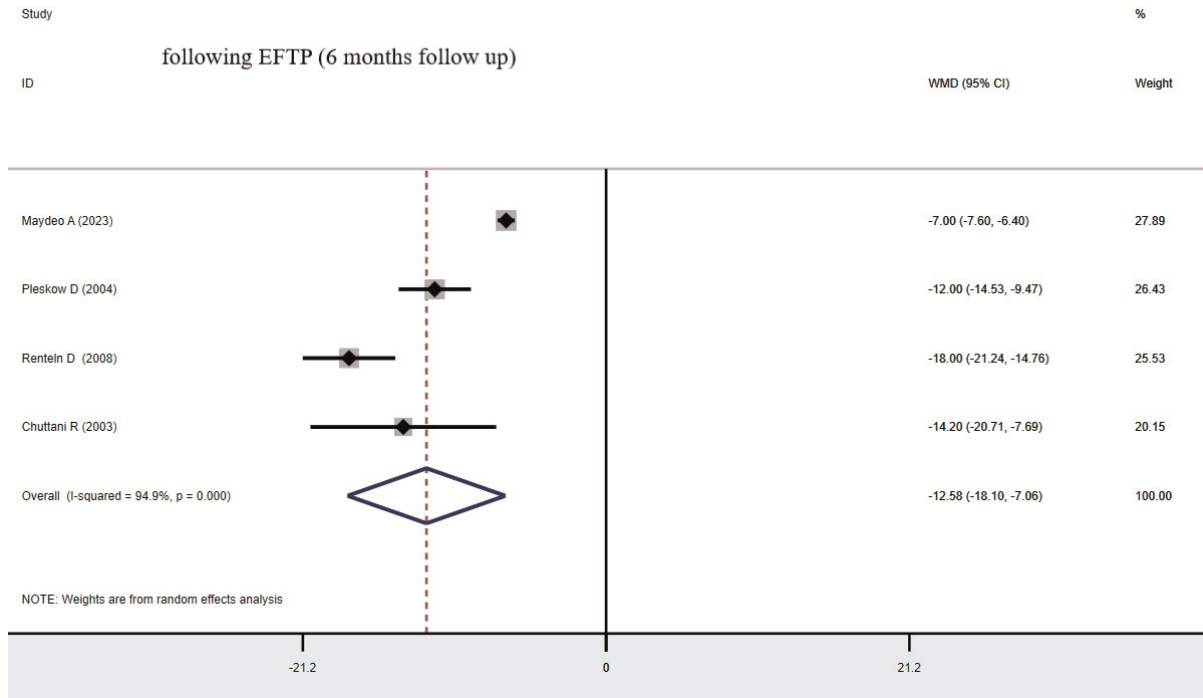

► **Supplemental Fig. 6** Forest plot of the change in GERD-HRQL scores following EFTP (6 months follow up).

## Supplementary material

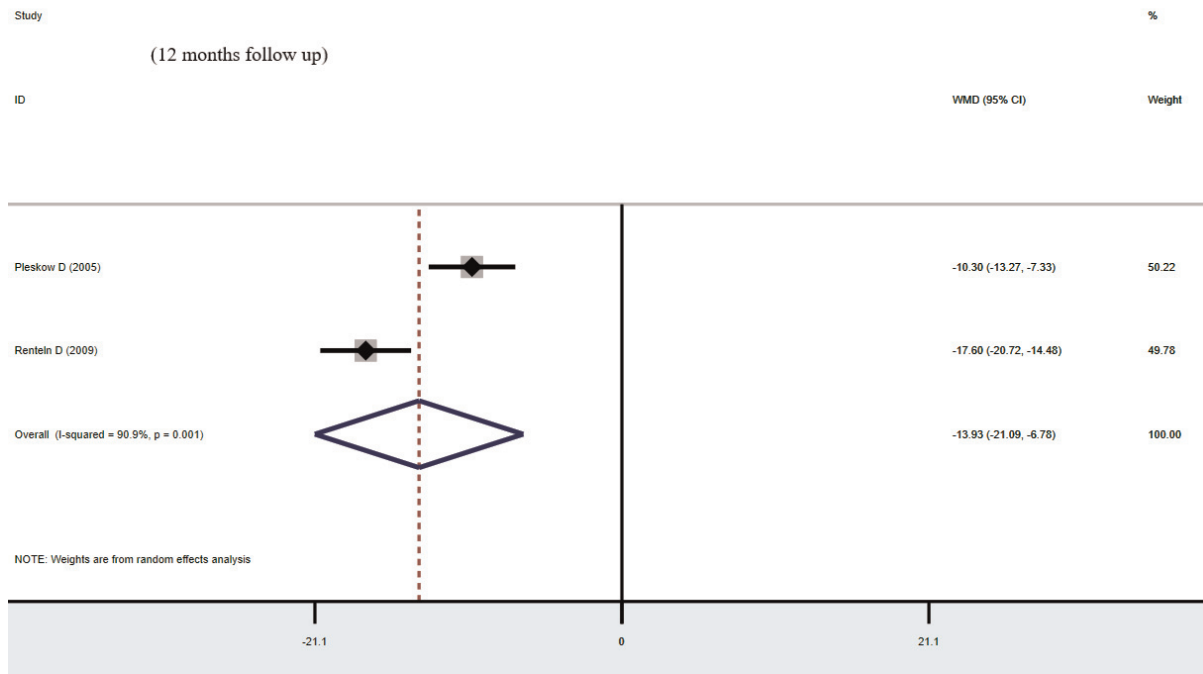

► **Supplemental Fig. 7** Forest plot of the change in GERD-HRQL scores following EFTP (12 months follow up).

## Supplementary material

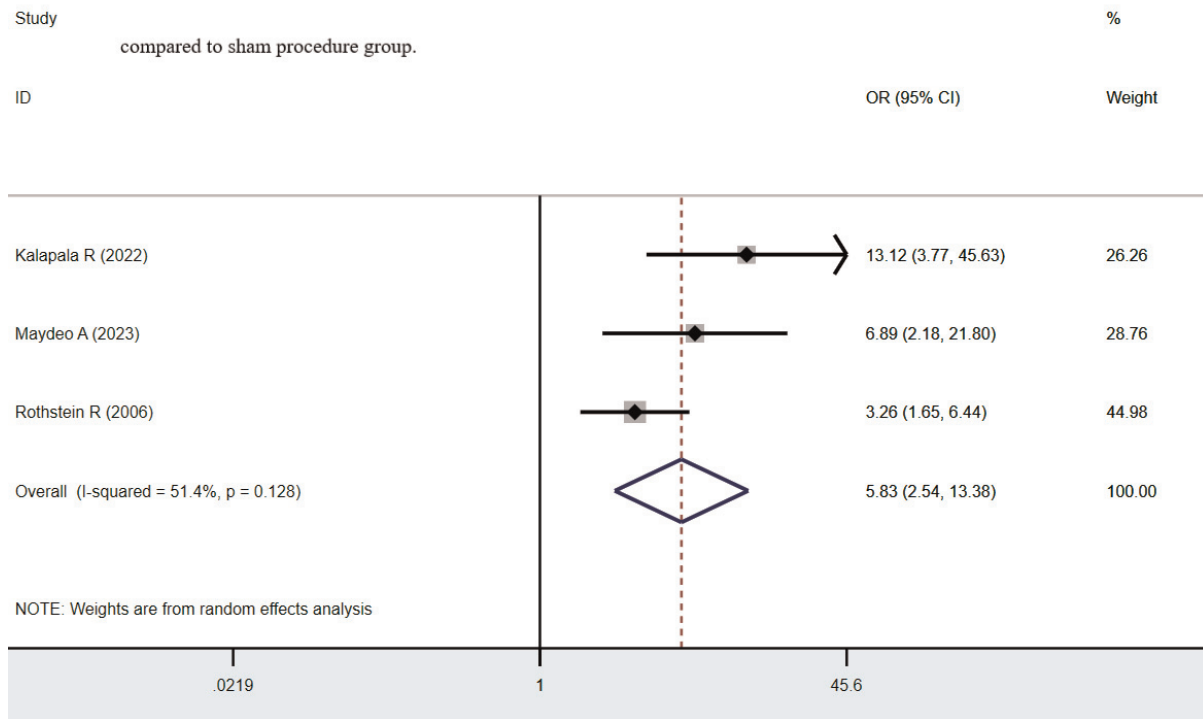

► **Supplemental Fig. 8** Forest plot of pooled odds ratio of the PPI cessation rate in EFTP group compared to sham procedure group.



## Supplementary material

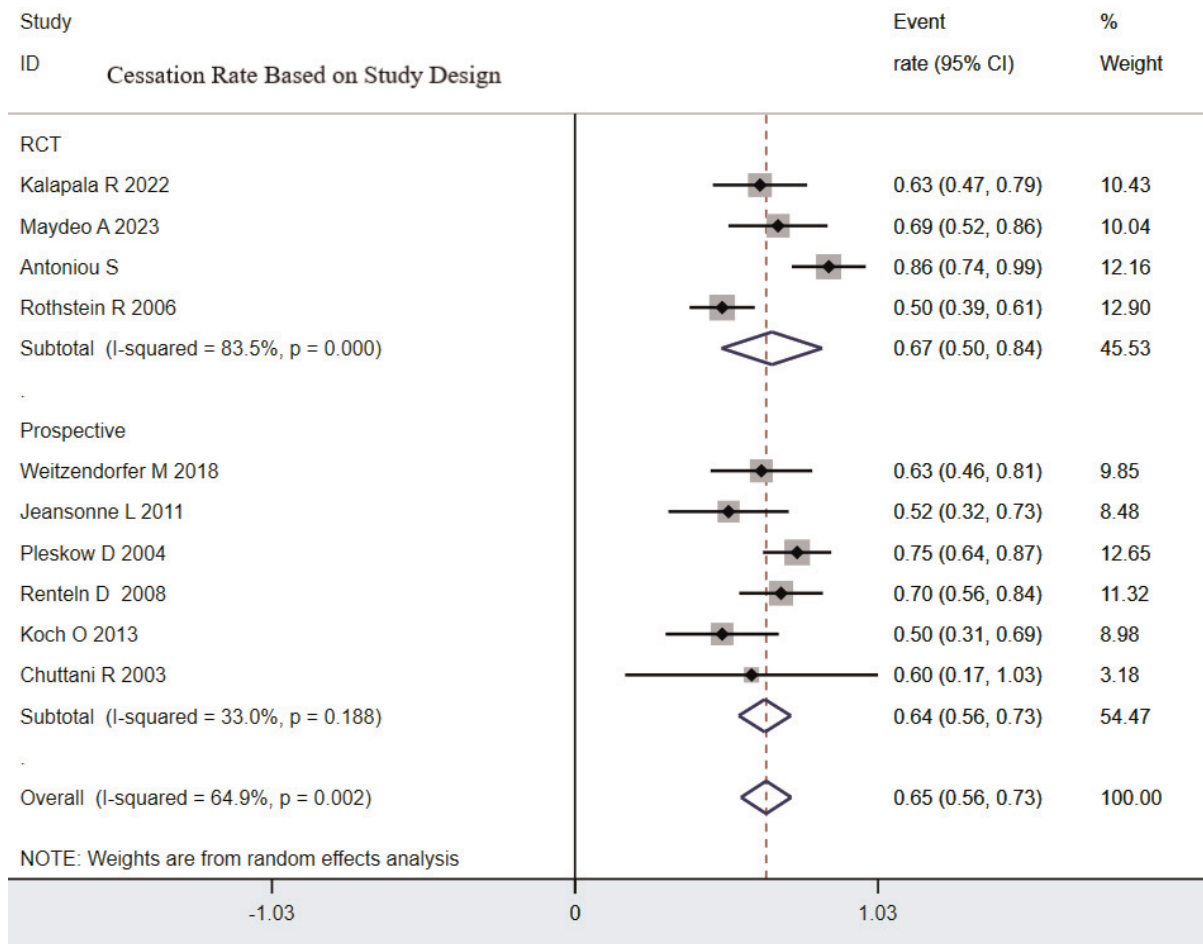

► **Supplemental Fig. 9** Forest Plot of Subgroup Analysis: Comparing PPI Cessation Rate Based on Study Design.

## Supplementary material

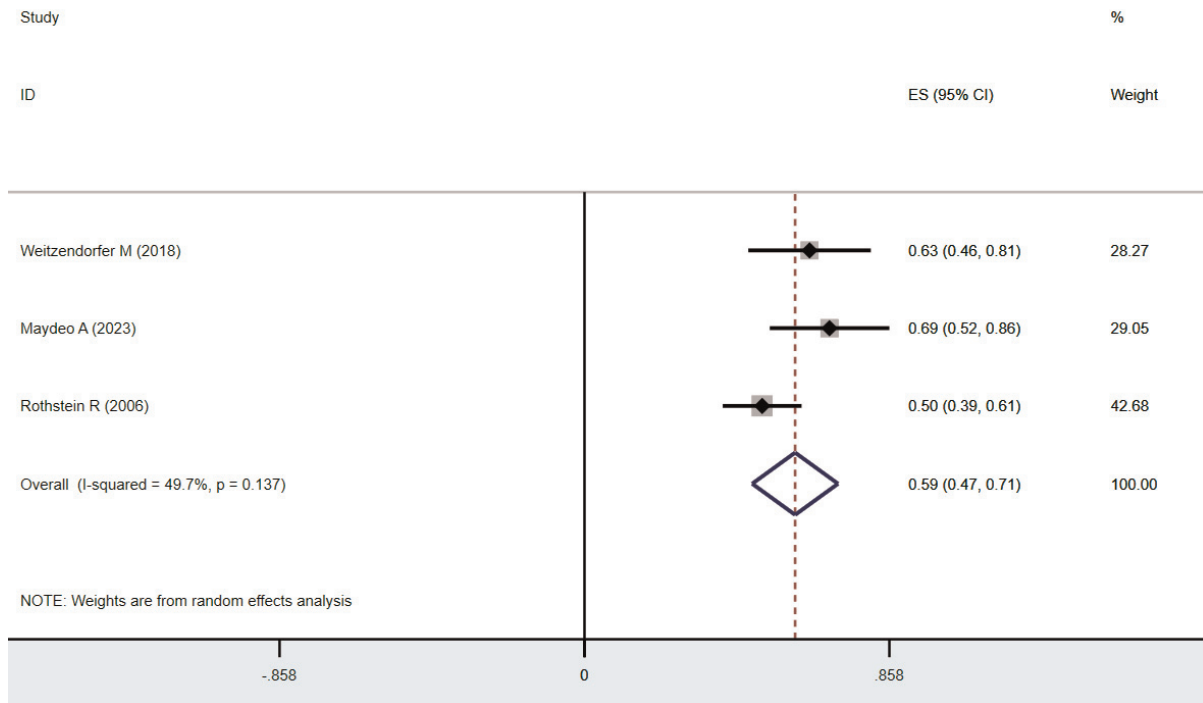

► **Supplemental Fig. 10** Forest plot of PPI cessation rates following EFTP (3 months follow up).

## Supplementary material

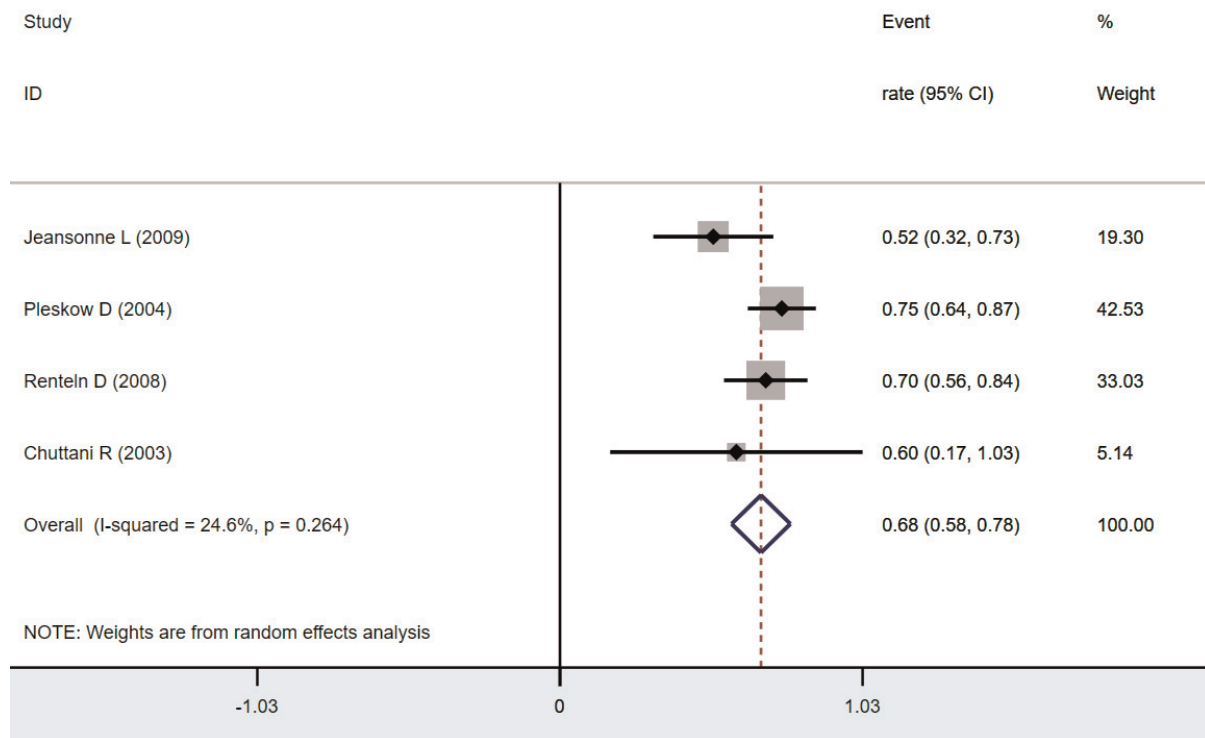

► **Supplemental Fig. 11** Forest plot of PPI cessation rates following EFTP (6 months follow up).

## Supplementary material

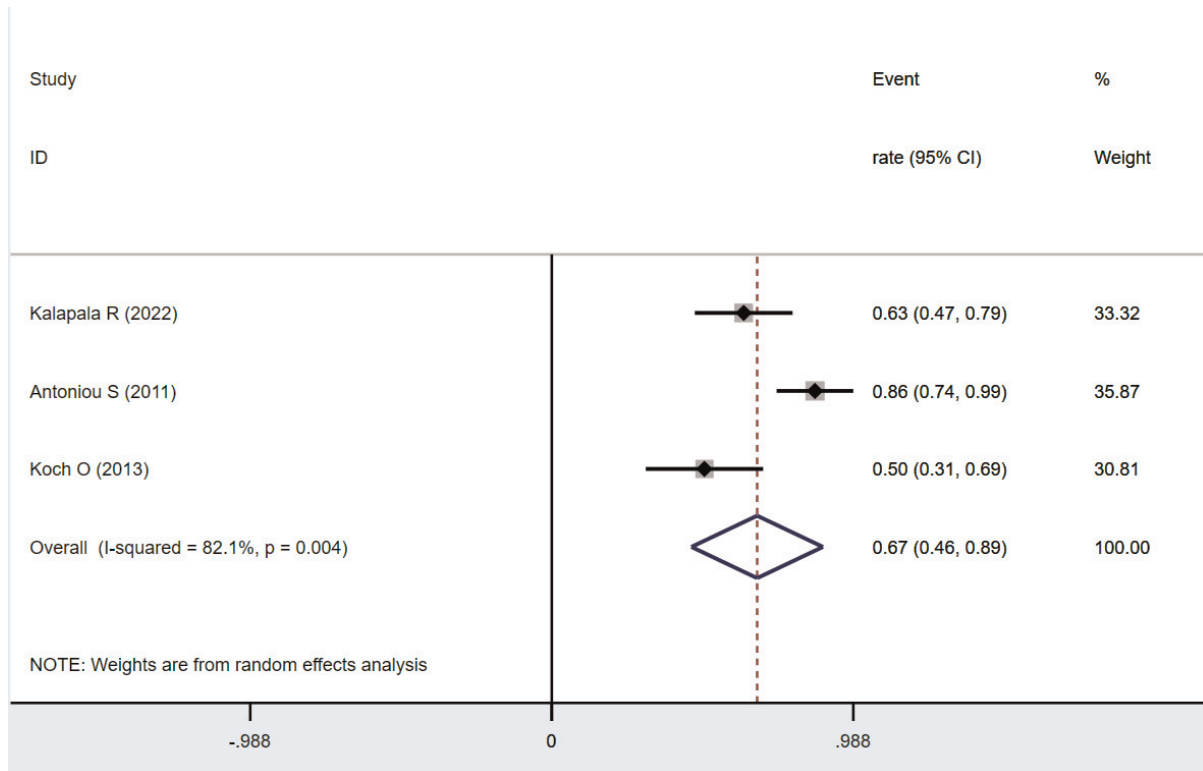

► **Supplemental Fig. 12** Forest plot of PPI cessation rates following EFTP (12 months follow up).

## Supplementary material

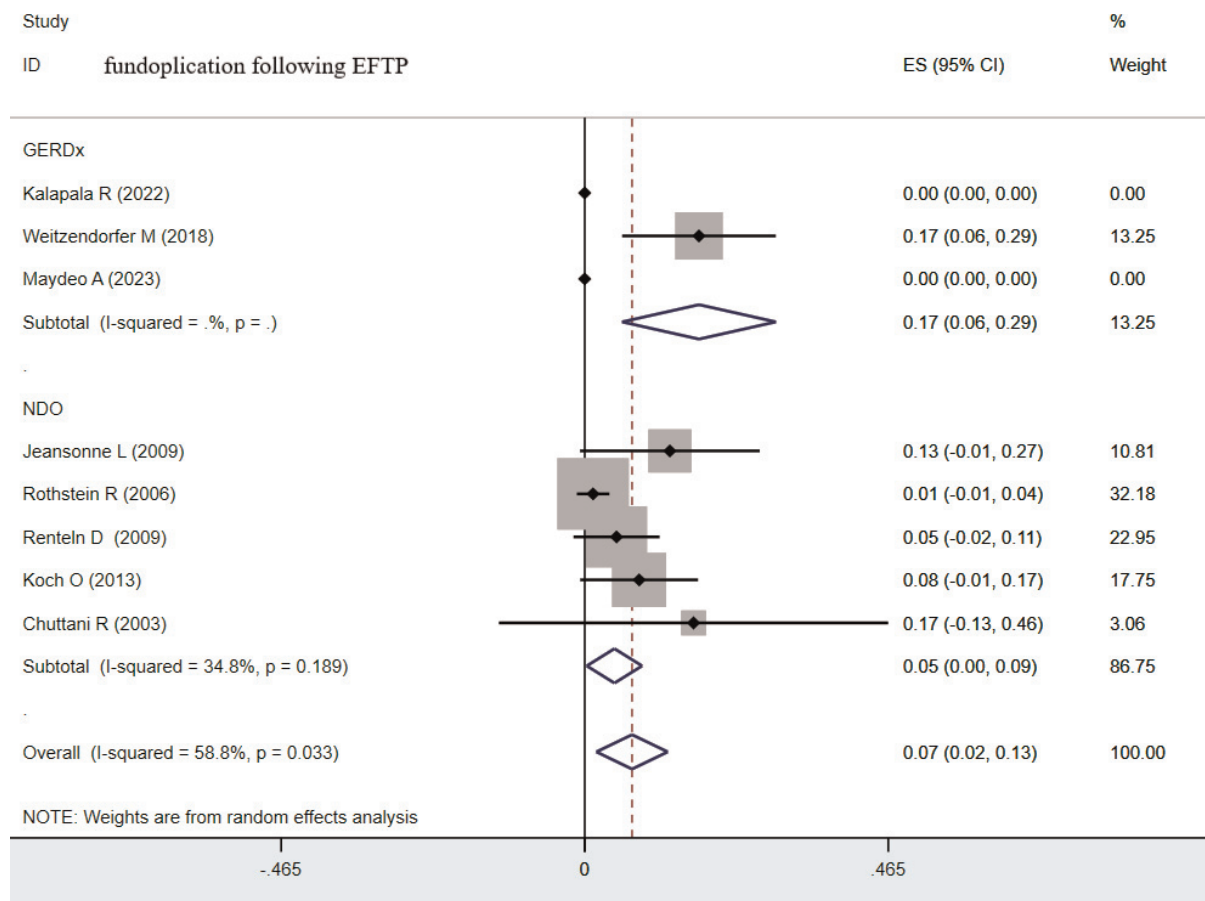

► **Supplemental Fig. 13** Forest plot of the rate of necessity for laparoscopic fundoplication following EFTP.

## Supplementary material

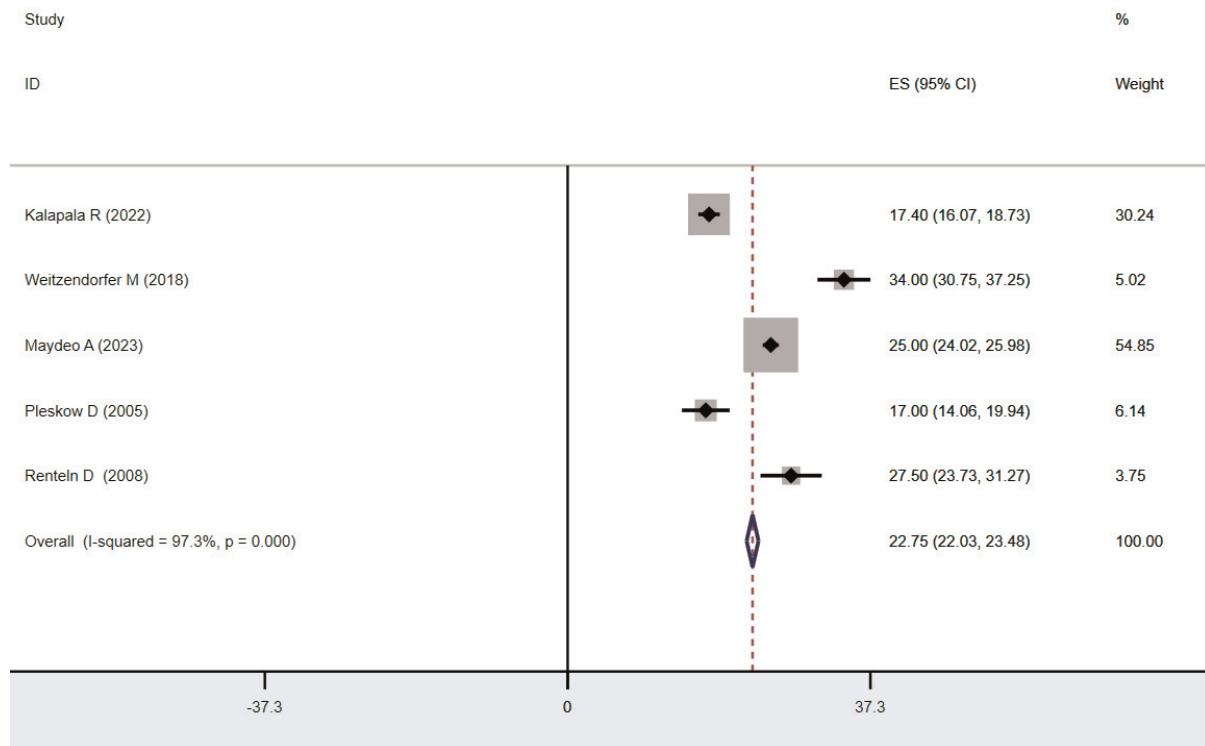

► **Supplemental Fig. 14** Forest plot of EFTP procedure time.

## Supplementary material

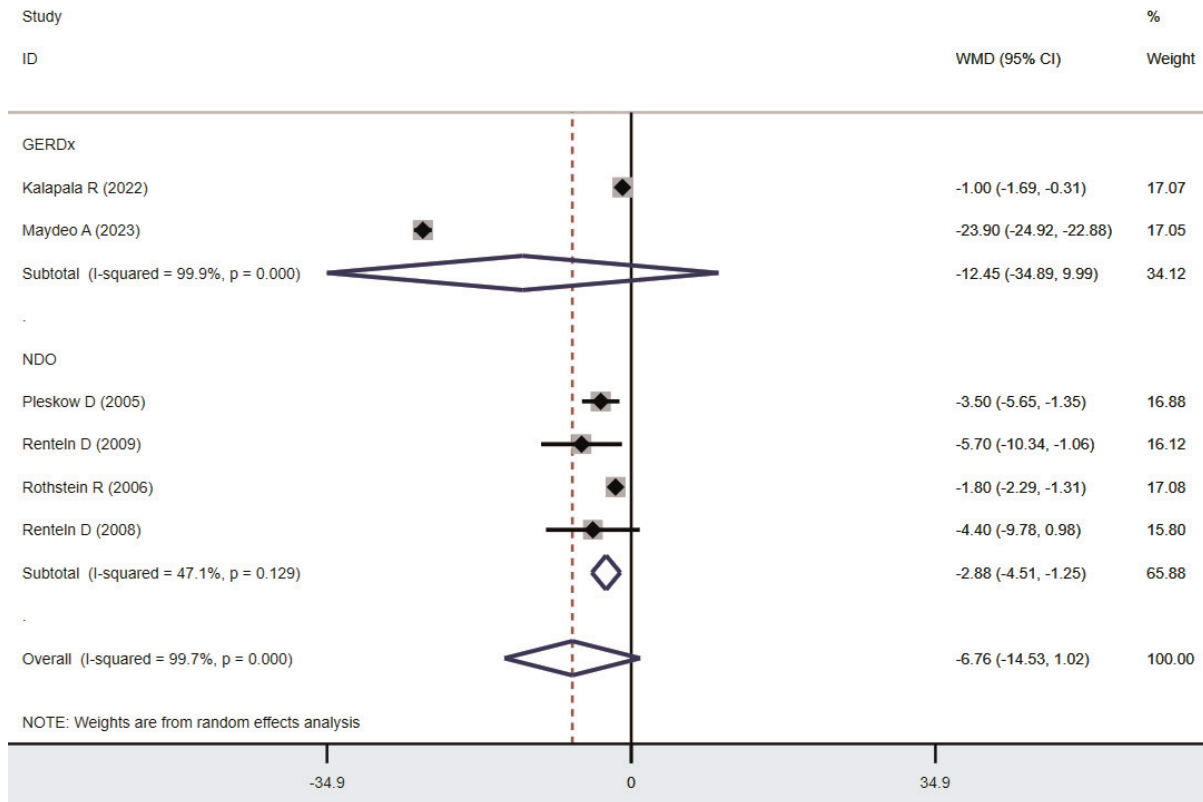

► **Supplemental Fig. 15** Forest plot of the change in the percentage time with esophageal pH <4.

## Supplementary material

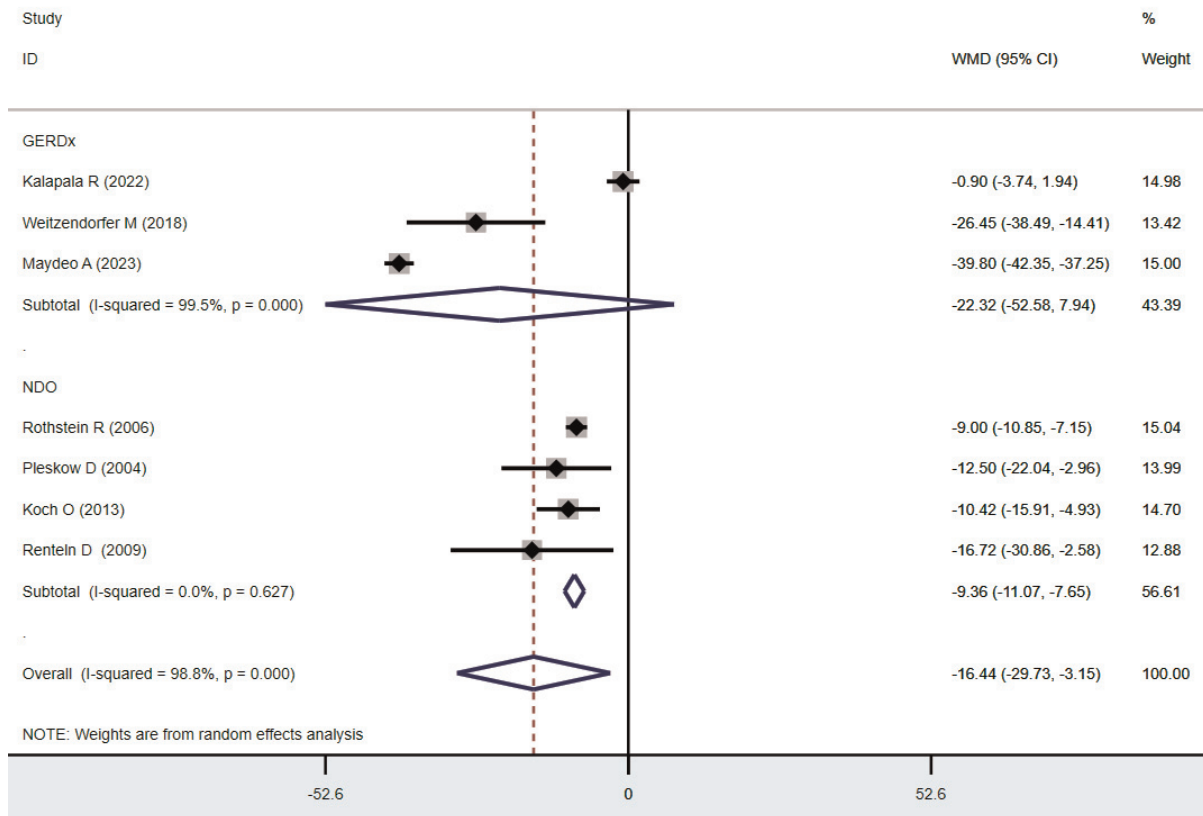

► **Supplemental Fig. 16** Forest plot of the change in DeMeester scores.



## Supplementary material

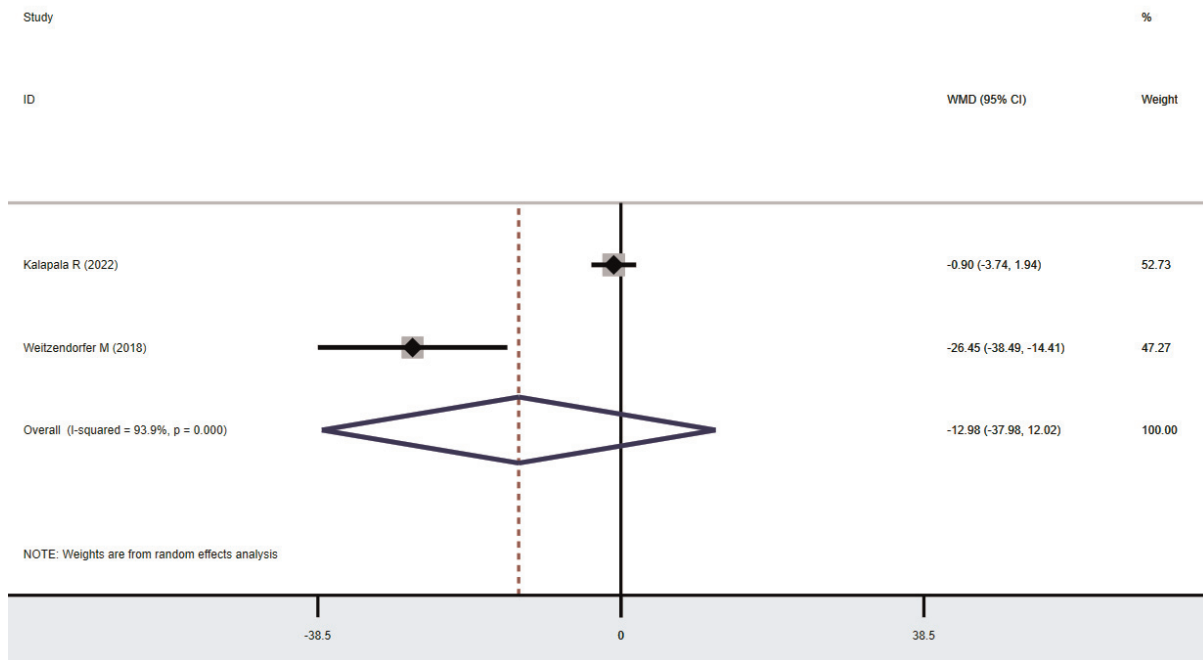

► **Supplemental Fig. 17** Forest plot of the change in DeMeester scores following EFTP (3 months follow up).

## Supplementary material

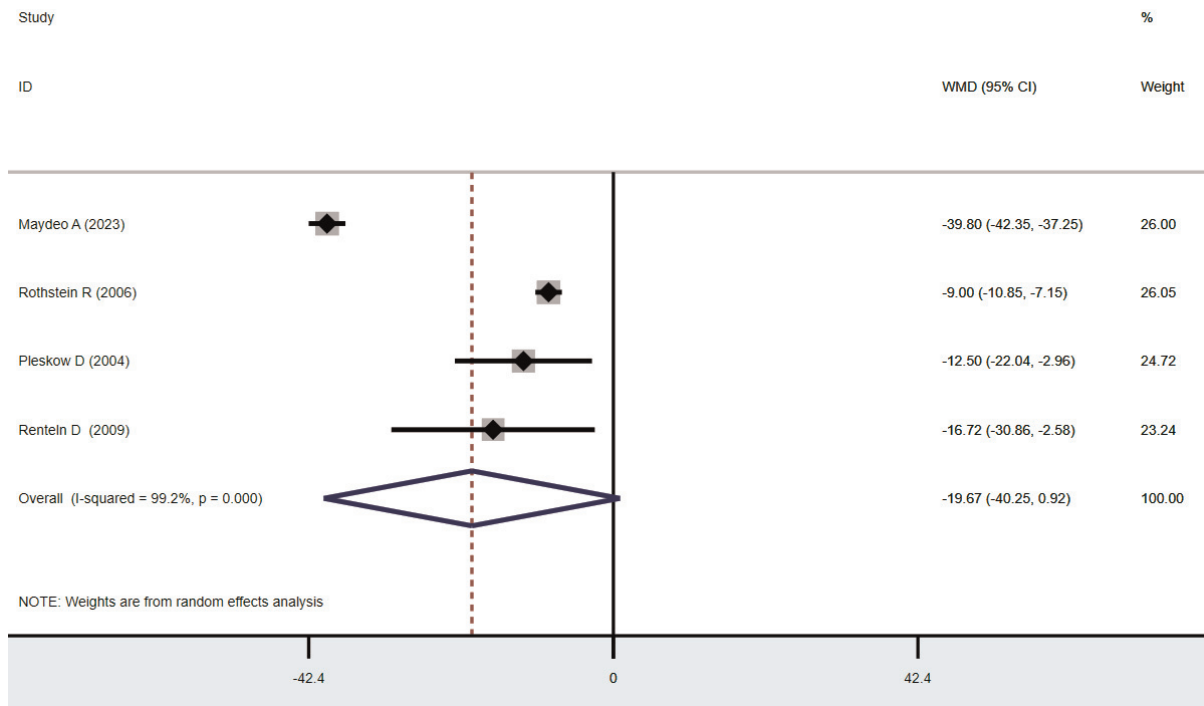

► **Supplemental Fig. 18** Forest plot of the change in DeMeester scores following EFTP (6 months follow up).

## Supplementary material

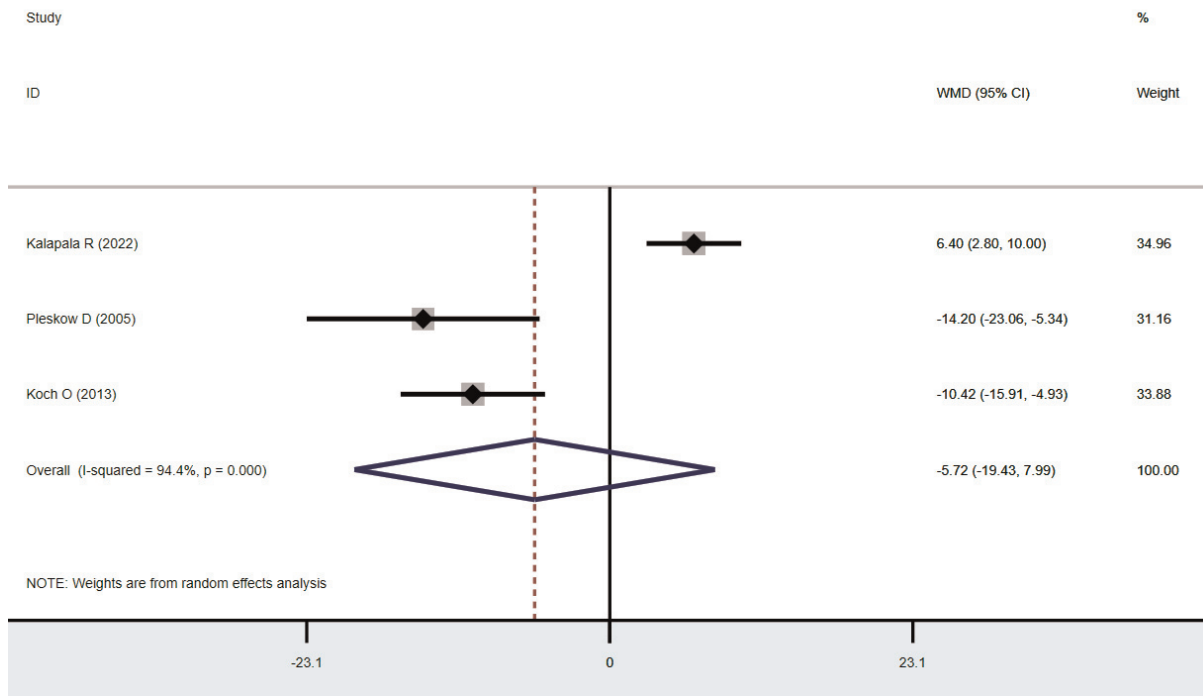

► **Supplemental Fig. 19** Forest plot of the change in DeMeester scores following EFTP (12 months follow up).

## Supplementary material

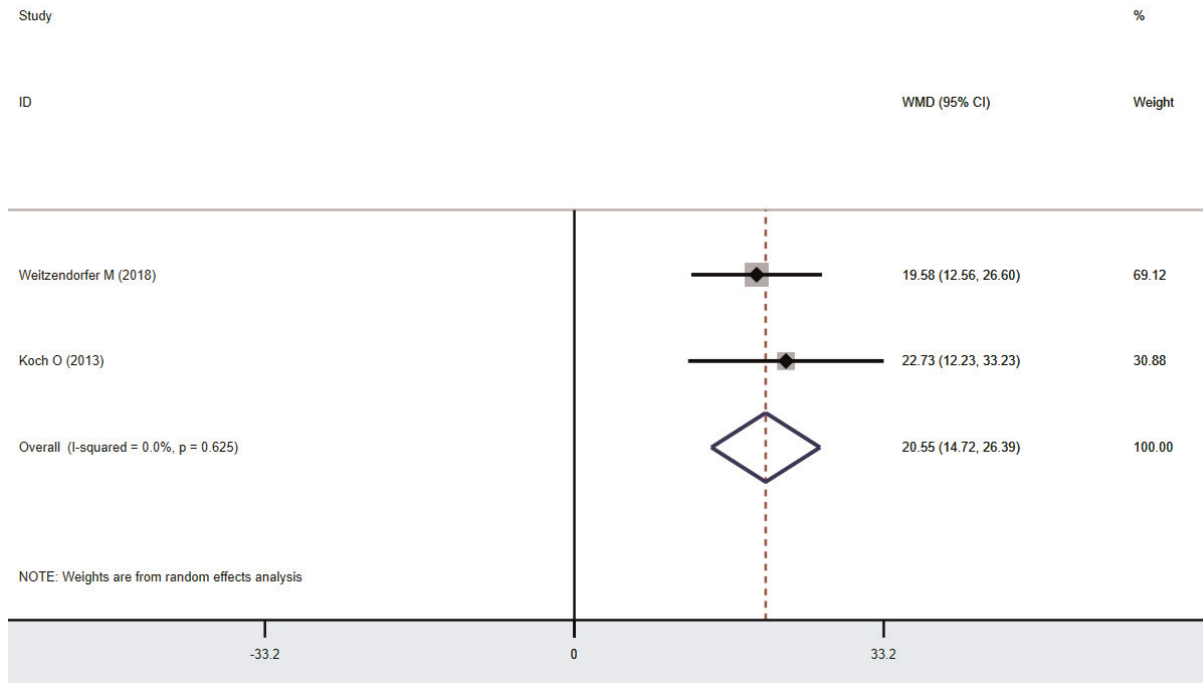

► **Supplemental Fig. 20** Forest plot of the change in GIQLI score following EFTP.

## Supplementary material

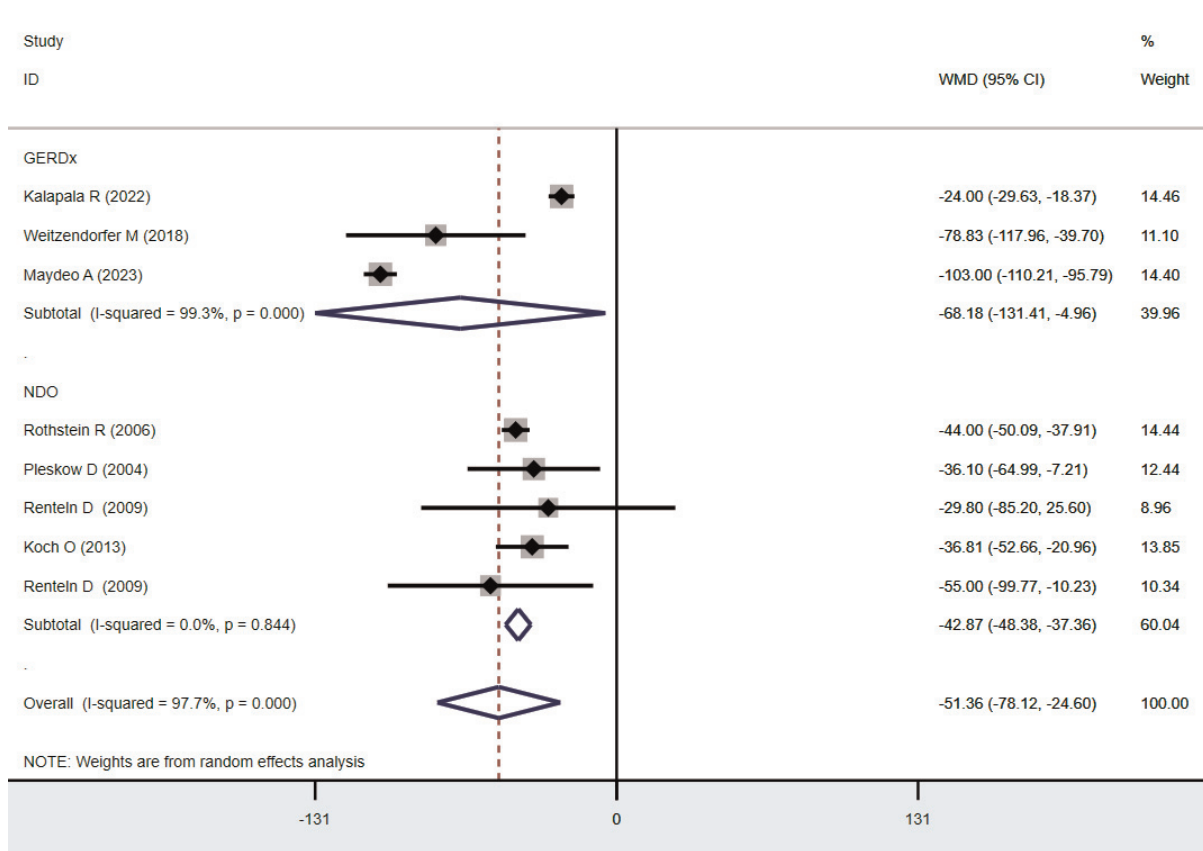

► **Supplemental Fig. 21** Forest plot of the change in total reflux episodes.

## Supplementary material

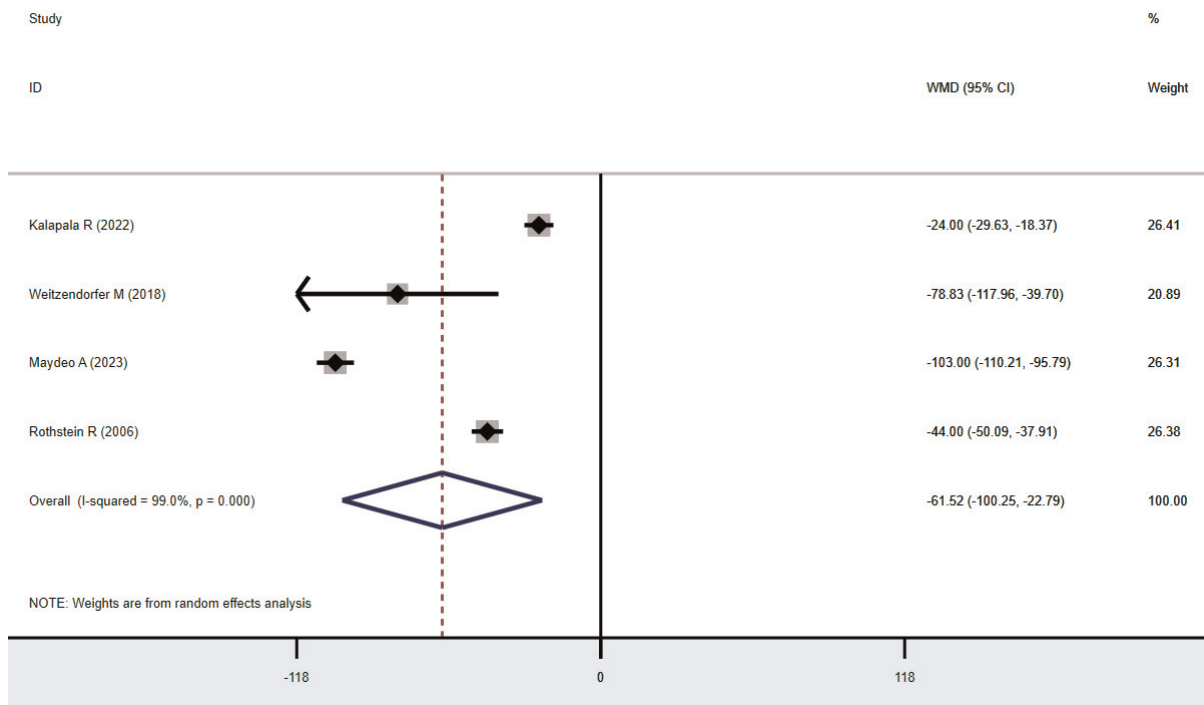

► **Supplemental Fig. 22** Forest plot of the change in total reflux episodes (3 months follow up).

## Supplementary material

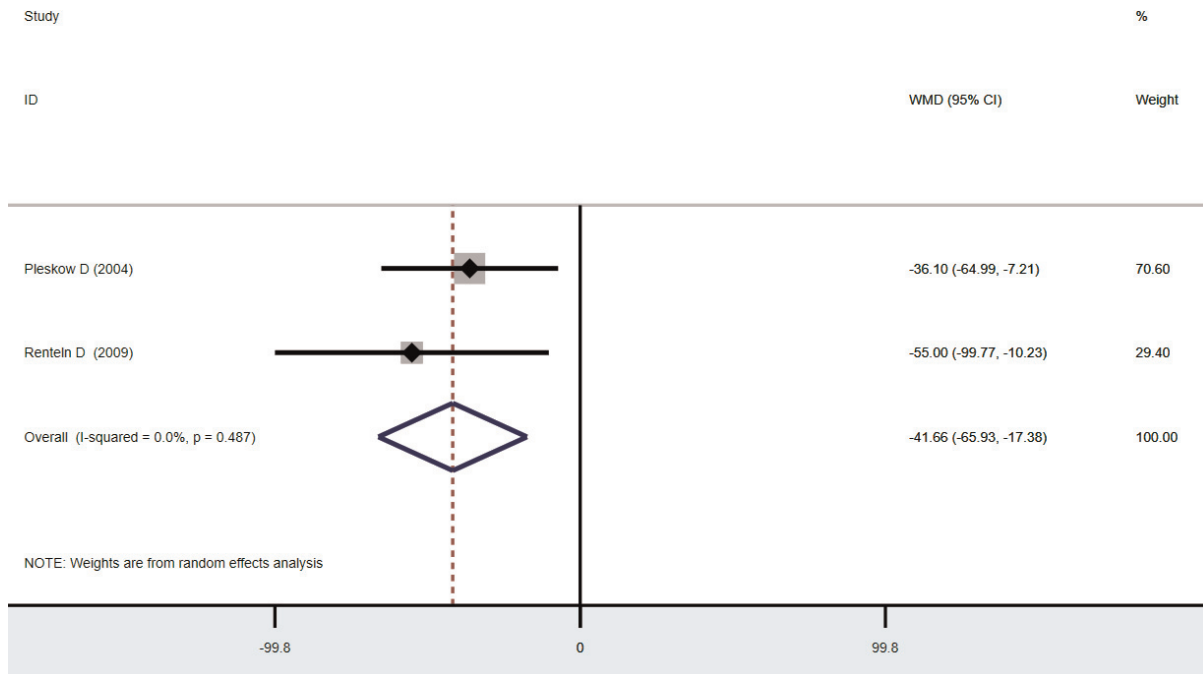

► **Supplemental Fig. 23** Forest plot of the change in total reflux episodes (6 months follow up).

## Supplementary material

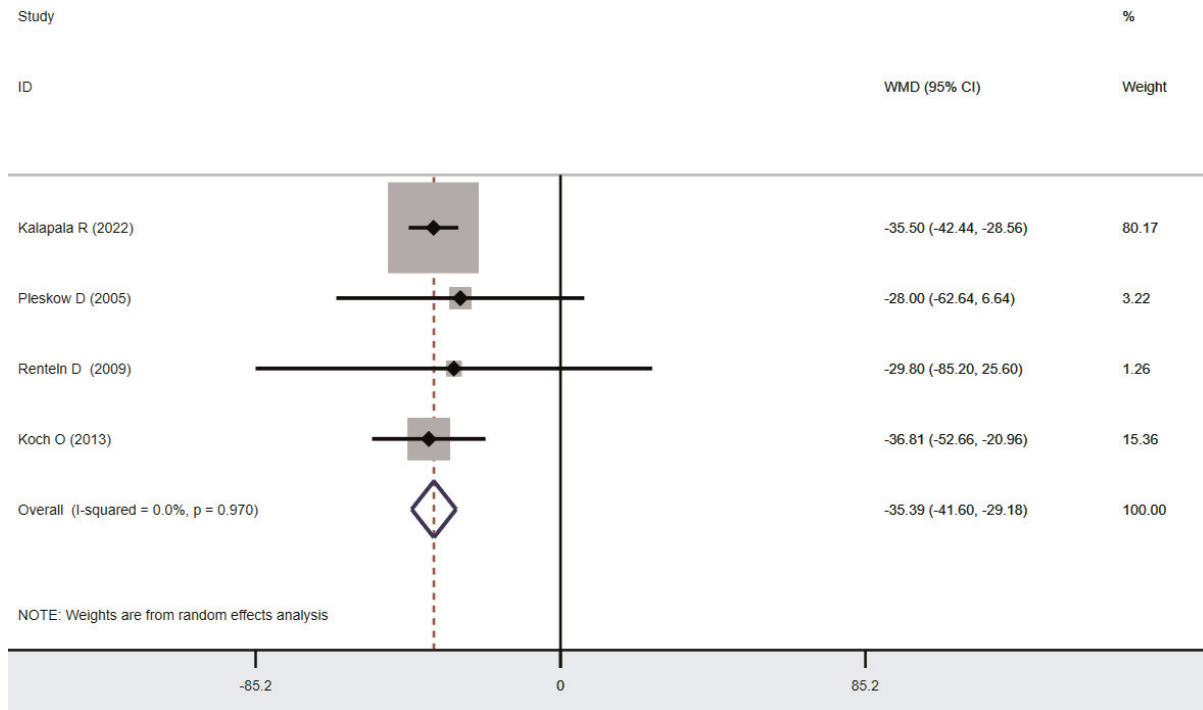

► **Supplemental Fig. 24** Forest plot of the change in total reflux episodes (12 months follow up).



## Supplementary material

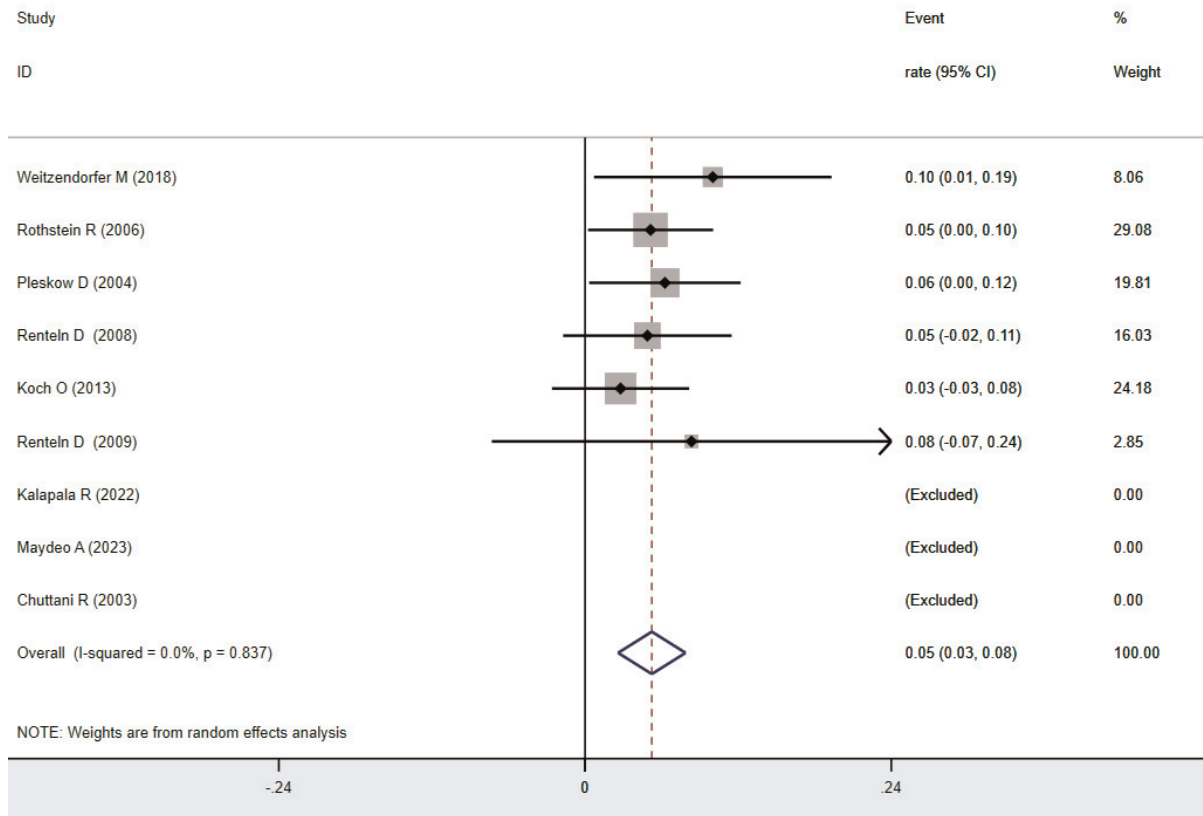

► **Supplemental Fig. 25** Forest plot of the incidence of severe adverse events.

## Supplementary material

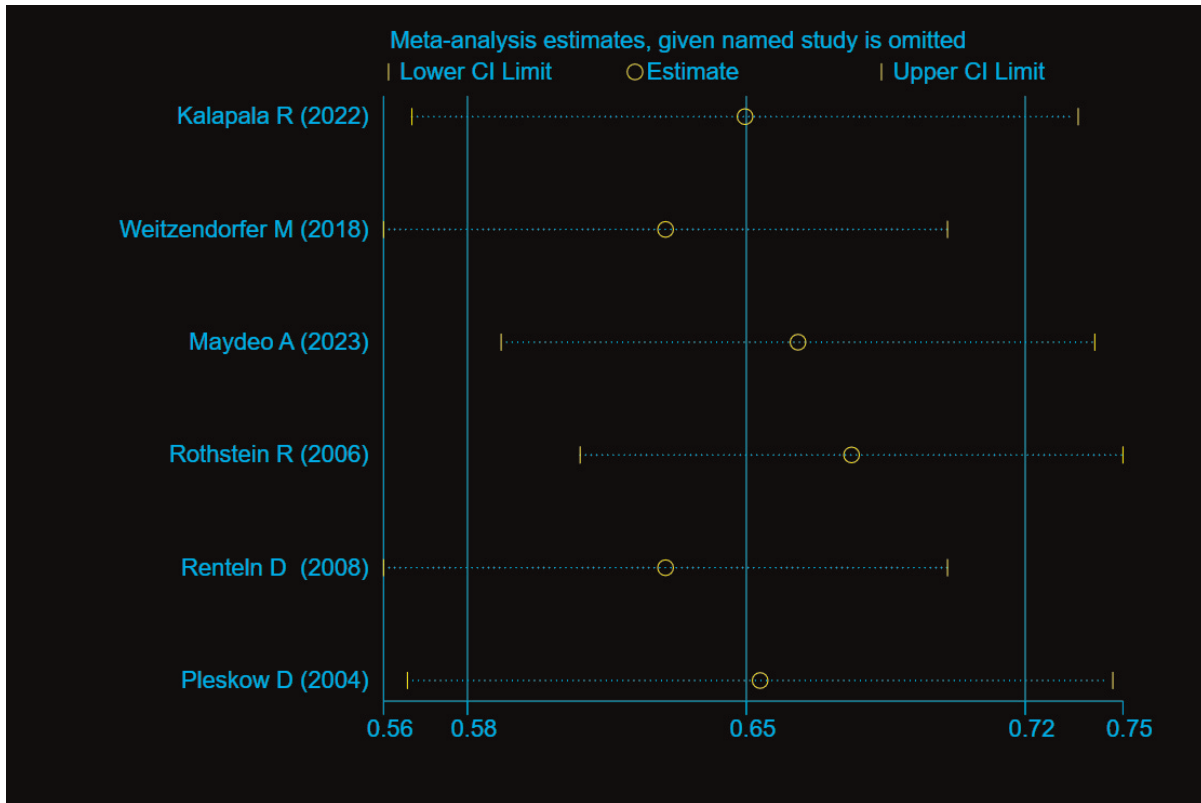

► **Supplemental Fig. 26** The sensitivity analysis for  $\geq 50\%$  improvement in GERD-HRQL scores after EFTP.

## Supplementary material

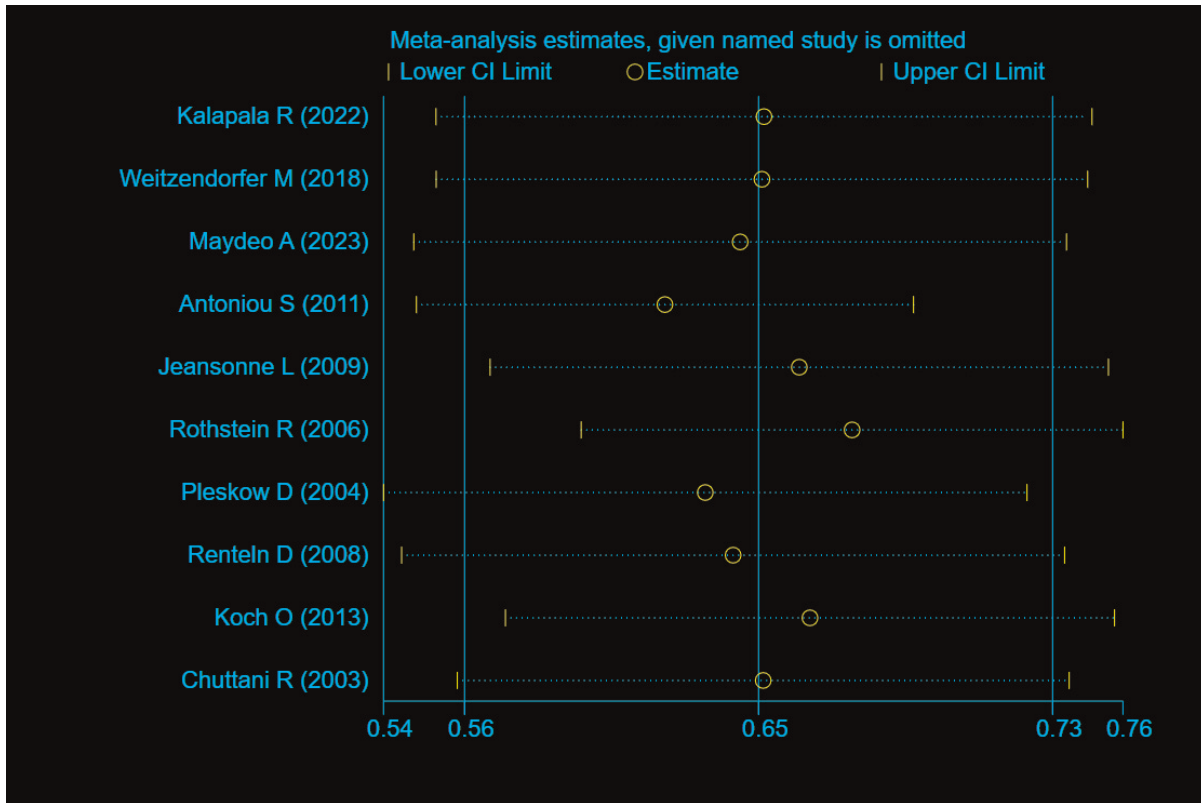

► **Supplemental Fig. 27** The sensitivity analysis for the PPI cessation rate after EFTP.

## Supplementary material

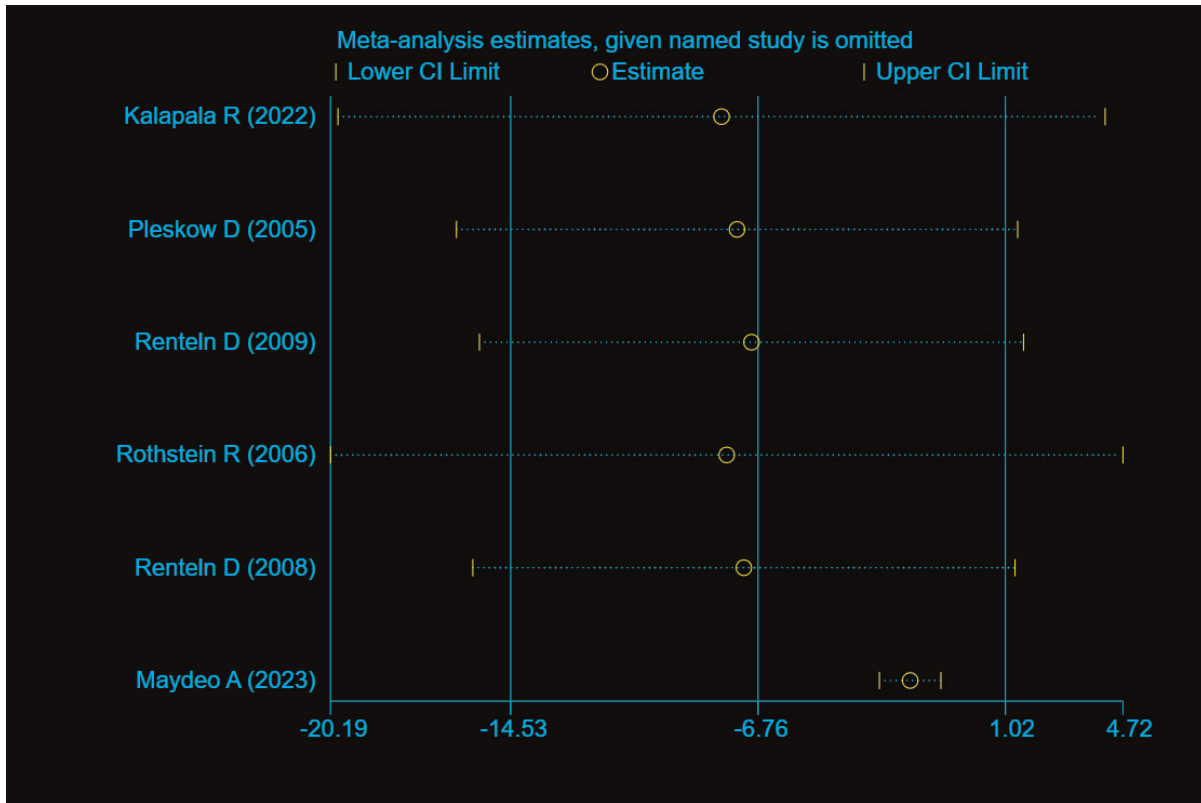

► **Supplemental Fig. 28** The sensitivity analysis for percentage of time with pH <4 after EFTP.

## Supplementary material

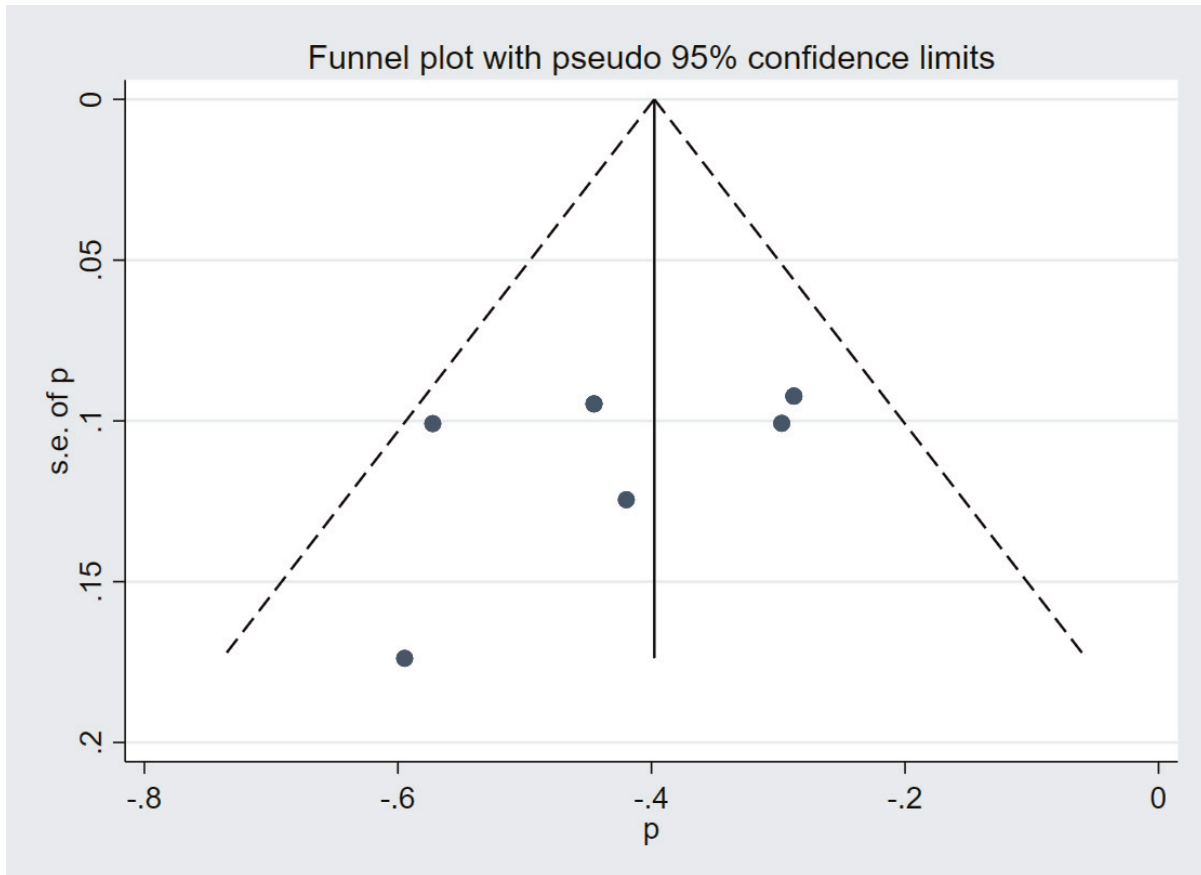

► **Supplemental Fig. 29** The funnel plots for  $\geq 50\%$  improvement in GERD-HRQL scores following EFTP.

## Supplementary material

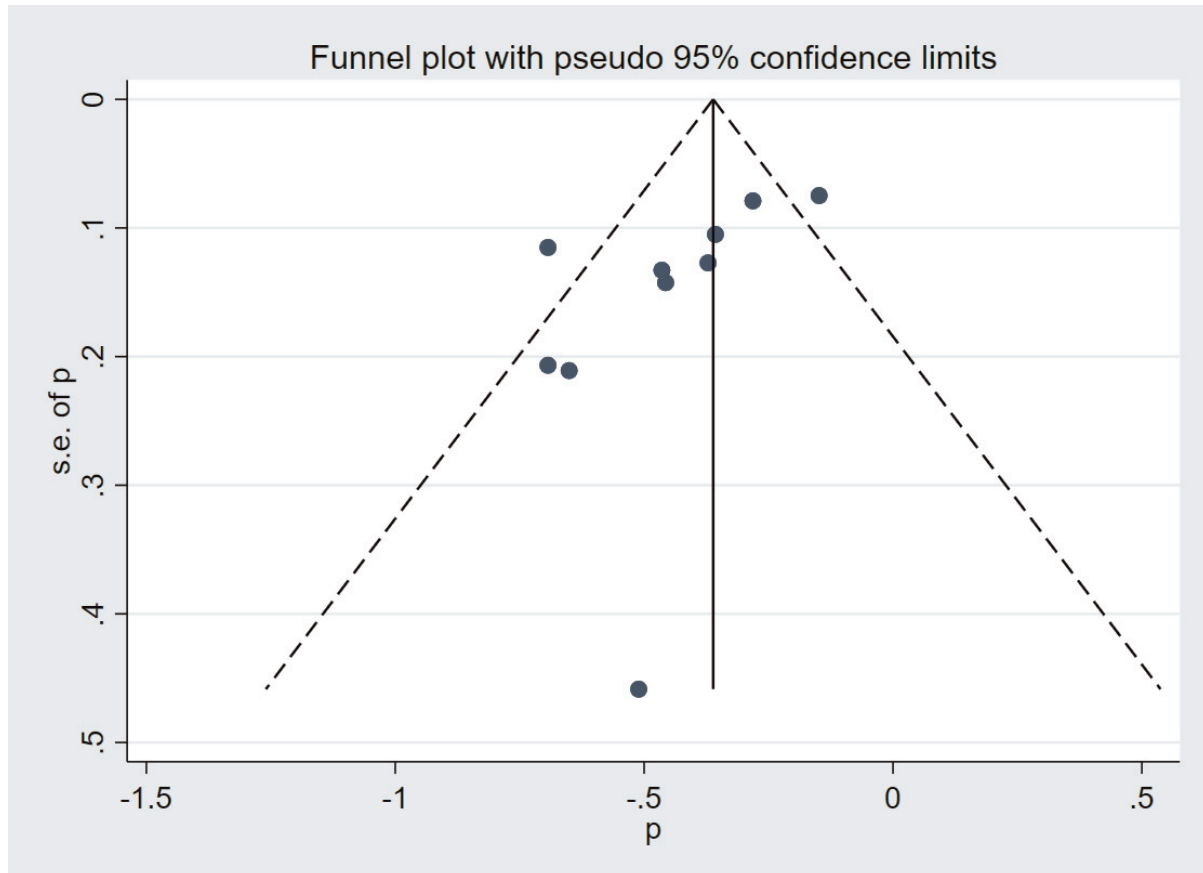

► **Supplemental Fig. 30** The funnel plots for PPI cessation rate following EFTP.
